# Supplementary material for: Therapy to target renal cell carcinoma using 131I-labeled B7-H3 monoclonal antibody
Source: PubMed Central journal article supplement (PMC5029751; doi:10.18632/oncotarget.8550), 2016-04-02
Supplement: oncotarget-07-24888-s001.pdf [file oncotarget-07-24888-s001.pdf]

# Therapy to target renal cell carcinoma using $^{131}\text{I}$ -labeled B7-H3 monoclonal antibody

## Supplementary Material

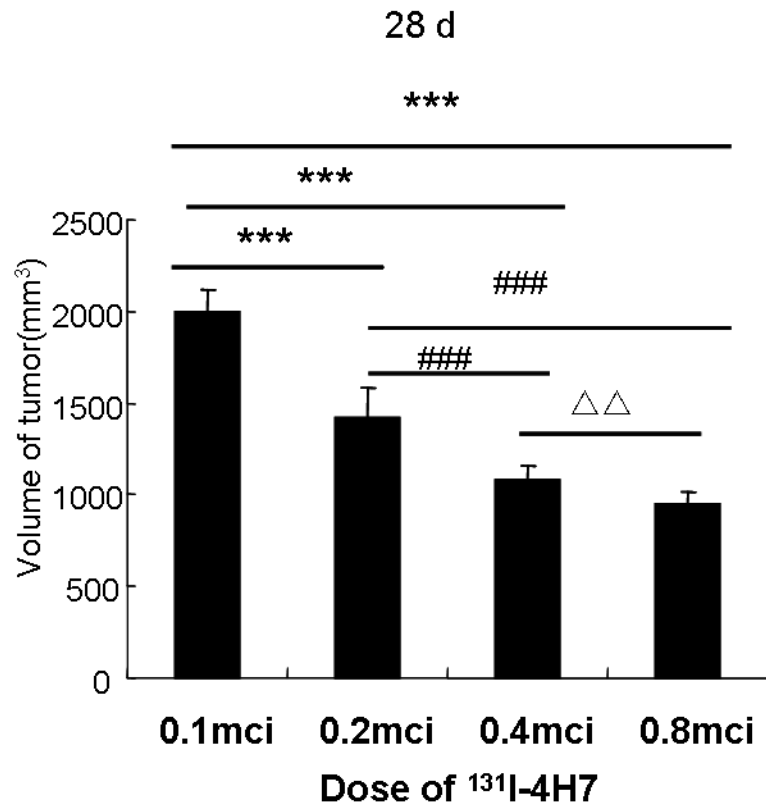

**Supplementary Figure 1.** Different doses of  $^{131}\text{I}$ -4H7 on tumor inhibition. The effect of  $^{131}\text{I}$ -4H7 on tumor inhibition was dose dependent, the higher dose of  $^{131}\text{I}$ -4H7, the more significant effect of anti-tumor. Data are mean  $\pm$  SD, n = 8 (\*\*\*:  $p < 0.001$ , 0.1 mci group vs. 0.2 mci, 0.4 mci, and 0.8 mci group. ###:  $p < 0.001$ , 0.2 mci group vs. 0.4 mci and 0.8 mci group. ^^:  $p < 0.01$ , 0.4 mci group vs. 0.8 mci group).

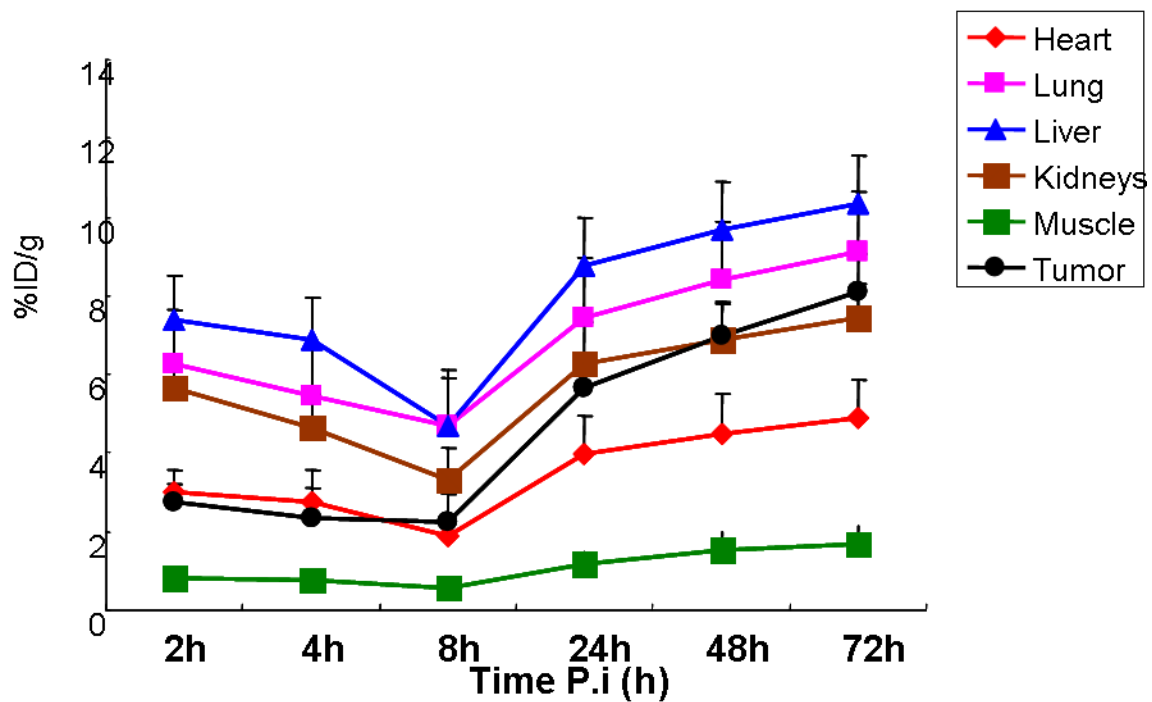

**Supplementary Figure 2.** Biodistribution of repeated injection of  $^{131}\text{I}$ -4H7 (3.7 MBq) in 786-0 tumor, heart, lung, liver, kidneys, and muscle after first intravenous injection of 3.7 MBq  $^{131}\text{I}$ -4H7 at 24 h. Data are mean  $\pm$  SD, n = 6.

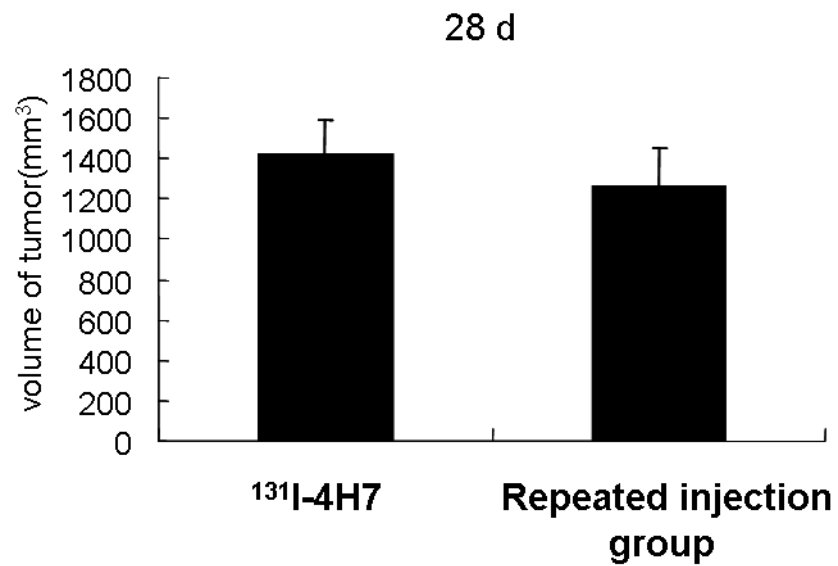

**Supplementary Figure 3.** The effect of <sup>131</sup>I-4H7 and repeated <sup>131</sup>I-4H7 on tumor growth. Nude mice with renal cell carcinoma (RCC) xenografts were injected with <sup>131</sup>I-4H7 (7.4 MBq) or repeated <sup>131</sup>I-4H7 (7.4 MBq) at 24 h after first injection. Tumor growth was monitored over 28 d. Data are mean ± SD, n = 8.

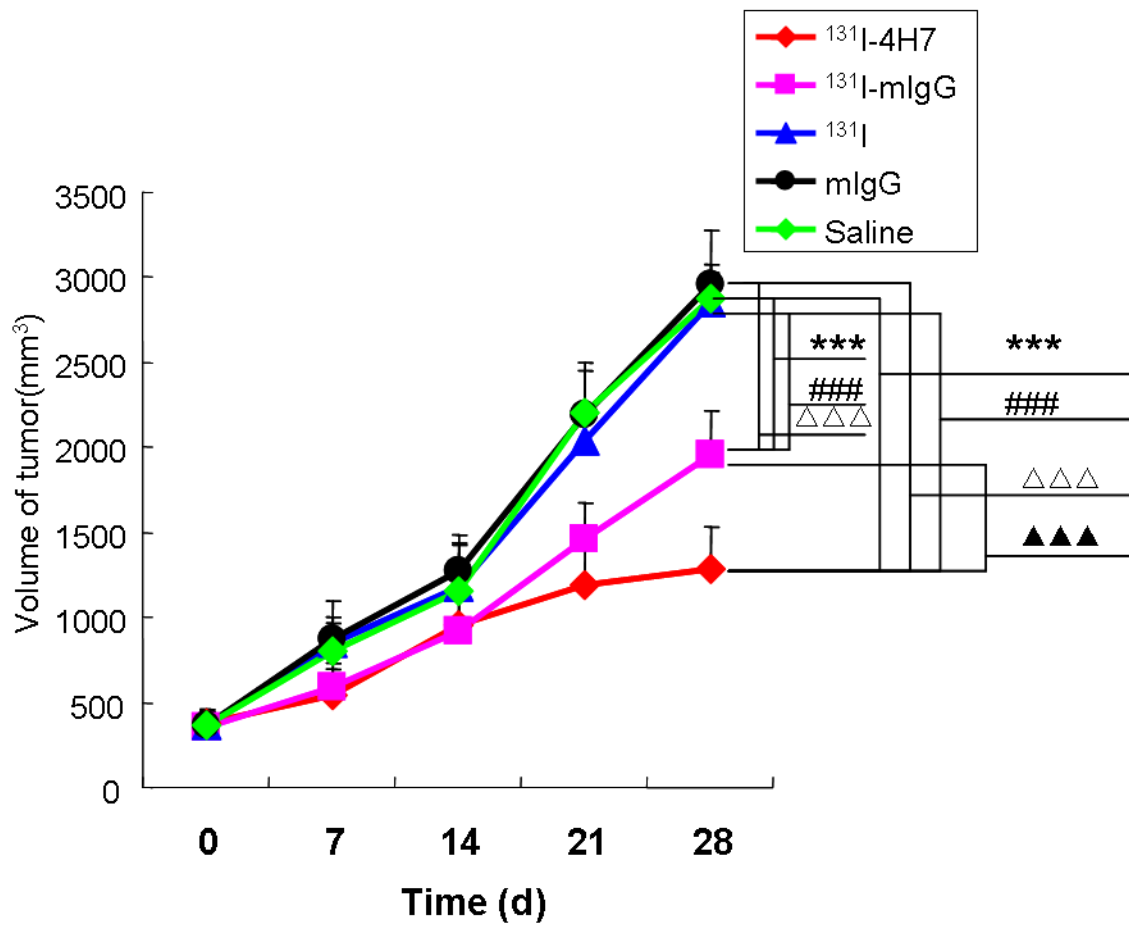

**Supplementary Figure 4.** The effect of drugs on tumor growth. Nude mice with renal cell carcinoma (RCC) xenografts were injected with saline, mIgG, <sup>131</sup>I, <sup>131</sup>I-mIgG, or <sup>131</sup>I-4H7. Tumor growth was monitored over 28 d. Data are mean ± SD, n = 8 (\*\*\*:  $p < 0.001$ , Saline group vs. <sup>131</sup>I-mIgG and <sup>131</sup>I-4H7 group.  $\Delta\Delta\Delta$ :  $p < 0.001$ , mIgG group vs. <sup>131</sup>I-mIgG and <sup>131</sup>I-4H7 group.  $\#\#\#$ :  $p < 0.001$ , <sup>131</sup>I group vs. <sup>131</sup>I-mIgG and <sup>131</sup>I-4H7 group.  $\blacktriangle\blacktriangle\blacktriangle$ :  $p < 0.001$ , <sup>131</sup>I-mIgG group vs. <sup>131</sup>I-4H7 group).

**Supplementary Table 1.** Volume of tumor at day 0, 7, 14, and 21 among groups of saline,  $^{131}\text{I}$ ,  $^{131}\text{I}$ -mIgG, and  $^{131}\text{I}$ -4H7 according to the PET-CT results

|                                           | Day 0        | Day 7                               | Day 14                                | Day 21                               |
|-------------------------------------------|--------------|-------------------------------------|---------------------------------------|--------------------------------------|
| Saline (mm <sup>3</sup> )                 | 321.61±22.46 | 2367.14±416.69                      | 3162.17±516.07                        | 4305.38±454.63                       |
| $^{131}\text{I}$ (mm <sup>3</sup> )       | 324.52±23.54 | 2019.65±119.34                      | 2642.29±176.29                        | 4078.97±166.53                       |
| $^{131}\text{I}$ -mIgG (mm <sup>3</sup> ) | 315.58±18.17 | 1347.96±162.23 <sup>***,###</sup>   | 1900.66±167.63 <sup>***,###</sup>     | 2453.30±209.01 <sup>***,###</sup>    |
| $^{131}\text{I}$ -4H7 (mm <sup>3</sup> )  | 308.42±16.15 | 735.66±68.15 <sup>***,###,△△△</sup> | 1145.04±156.33 <sup>***,###,△△△</sup> | 1493.50±330.11 <sup>***,###,△△</sup> |

<sup>\*\*\*</sup>:  $p < 0.001$ ,  $^{131}\text{I}$ ,  $^{131}\text{I}$ -mIgG, and  $^{131}\text{I}$ -4H7 group vs. Saline group. <sup>###</sup>:  $p < 0.001$ ,  $^{131}\text{I}$ -mIgG, and  $^{131}\text{I}$ -4H7 group vs.  $^{131}\text{I}$  group. <sup>△△</sup>:  $p < 0.01$ ; <sup>△△△</sup>:  $p < 0.001$ ,  $^{131}\text{I}$ -4H7 group vs.  $^{131}\text{I}$ -mIgG group.

**Supplementary Table 2.** Volume of tumor at day 0, 7, 14, 21, and 28 among groups of saline, <sup>131</sup>I, <sup>131</sup>I-mIgG, and <sup>131</sup>I-4H7 (Unit: mm<sup>3</sup>)

| Group                 | Day 0        | Day 7                         | Day 14                     | Day 21                              | Day 28                                |
|-----------------------|--------------|-------------------------------|----------------------------|-------------------------------------|---------------------------------------|
| Saline                | 361.61±81.60 | 806.19±160.06                 | 1159.31±280.05             | 2202.20±290.58                      | 2871.77±207.68                        |
| <sup>131</sup> I      | 366.61±85.18 | 843.69±256.91                 | 1178.06±250.27             | 2036.07±219.79                      | 2846.77±184.90                        |
| <sup>131</sup> I-mIgG | 353.35±68.05 | 588.03±141.17 <sup>*,#</sup>  | 924.37±182.29 <sup>#</sup> | 1466.15±209.74 <sup>***,###</sup>   | 1955.03±260.48 <sup>***,###</sup>     |
| <sup>131</sup> I-4H7  | 374.55±79.53 | 545.37±155.25 <sup>**,#</sup> | 953.80±213.33 <sup>#</sup> | 1190.35±221.00 <sup>***,###,Δ</sup> | 1286.97±241.11 <sup>***,###,ΔΔΔ</sup> |

\*:  $p < 0.05$ , \*\*:  $p < 0.01$ , \*\*\*:  $p < 0.001$ , <sup>131</sup>I, <sup>131</sup>I-mIgG, and <sup>131</sup>I-4H7 group vs. Saline group. #:  $p < 0.05$ , ###:  $p < 0.001$ , <sup>131</sup>I-mIgG, and <sup>131</sup>I-4H7 group vs. <sup>131</sup>I group. Δ:  $p < 0.05$ ; ΔΔΔ:  $p < 0.001$ , <sup>131</sup>I-4H7 group vs. <sup>131</sup>I-mIgG group.

**Supplementary Table 3.** Rate of tumor inhibition (%) at day 7, 14, 21, and 28 among groups of saline,  $^{131}\text{I}$ ,  $^{131}\text{I}$ -mIgG, and  $^{131}\text{I}$ -4H7

|                            | Day 7 | Day 14 | Day 21 | Day 28 |
|----------------------------|-------|--------|--------|--------|
| $^{131}\text{I}$ (%)       | -4.65 | -1.62  | 7.54   | 0.87   |
| $^{131}\text{I}$ -mIgG (%) | 27.06 | 20.27  | 33.42  | 31.92  |
| $^{131}\text{I}$ -4H7 (%)  | 32.35 | 17.73  | 45.95  | 55.19  |

**Supplementary Table 4.** Description and comparison of biochemical characteristics between before and after different time-points of <sup>131</sup>I-4H7 administration

|                          | before     | 2h         | 7d         | 14d        | 21d        | 28d        |
|--------------------------|------------|------------|------------|------------|------------|------------|
| WBC(^10 <sup>9</sup> /L) | 3.56±0.08  | 3.57±0.07  | 3.54±0.05  | 3.47±0.12  | 3.49±0.05  | 3.50±0.06  |
| ALT (u/L)                | 37.20±2.17 | 35.8±2.86  | 35.40±2.61 | 35.00±2.24 | 35.80±2.28 | 35.80±2.86 |
| AST (u/L)                | 29.20±2.28 | 28.80±1.92 | 27.60±2.07 | 27.40±1.67 | 27.60±2.70 | 27.80±2.28 |
| BNU (mmol/L)             | 7.72±0.46  | 7.44±0.45  | 7.60±0.44  | 7.52±0.43  | 7.50±0.54  | 7.48±0.31  |
| Cr (mmol/L)              | 68.80±2.28 | 67.60±3.51 | 67.00±4.47 | 71.00±2.83 | 66.80±4.82 | 67.40±3.85 |
